# Supplementary material for: Associations of childhood, maternal and household dietary patterns with childhood stunting in Ethiopia: proposing an alternative and plausible dietary analysis method to dietary diversity scores
Source: Springer Nature journal article supplement (doi:10.1186/s12937-018-0316-3), 2018-01-29
Supplement: MOESM1 [file 25659154]

**Supplementary Table 1:** Components of food groups used for dietary pattern (household and maternal), 2014

| <b>Food group</b>                                                                          | <b>Components</b>                                                                                                                                              |
|--------------------------------------------------------------------------------------------|----------------------------------------------------------------------------------------------------------------------------------------------------------------|
| cereals                                                                                    | Rice, bread made of wheat, puffed rice, injera, pressed rice, noodles, or any other foods made with rice, wheat, maize/corn, or other locally available grains |
| vitamin a rich vegetables and tubers                                                       | Pumpkin, carrots, sweet potatoes that are orange and yellow inside                                                                                             |
| white tubers and roots or other starchy foods                                              | Potatoes, white yams, white sweet potato (not orange inside), potato crisps or other foods made from roots (not orange or yellow roots)                        |
| dark green leafy vegetables                                                                | Dark green leafy vegetables, including spinach, kale, costa,                                                                                                   |
| other vegetables                                                                           | Other vegetables (e.g., squash, eggplant, green papaya, cauliflower, cabbage, onion, (beans)                                                                   |
| vitamin a rich fruits                                                                      | Ripe mangoes, ripe papaya                                                                                                                                      |
| other fruits                                                                               | banana, apples, guava, oranges, other citrus fruits, pineapple, watermelon, olives, grapes, (grapefruit) berries, , plum                                       |
| beef, goat, lamb, chicken, duck or other birds, liver, kidney, heart, or other organ meats |                                                                                                                                                                |
| eggs                                                                                       | Eggs of different birds – chicken, duck, turkey etc.; with yolk, without yolk                                                                                  |
| fish                                                                                       | Big/small fresh or dried fish or shellfish                                                                                                                     |
| any foods made from beans, peas, or lentils                                                | Beans, peas, lentils, other pulses, soybeans, peas                                                                                                             |
| milk and milk products                                                                     | Milk, cheese, yogurt or other milk products                                                                                                                    |
| oils and fats                                                                              | Oil, fats or butter added to food or used for cooking including ghee                                                                                           |
| sweets                                                                                     | Sugar, molasses, honey, misti, cold drinks, chocolates, candies, biscuits                                                                                      |
| spices, condiments, beverages                                                              | Spices (cumin, coriander, salt), condiments (pickles, chutney), coffee, tea, etc.                                                                              |

**Supplementary Table 2:** Components of food groups used for dietary pattern (children), 2014

| No | Food items                                                                                                                              |
|----|-----------------------------------------------------------------------------------------------------------------------------------------|
| 1  | Any porridge                                                                                                                            |
| 2  | Any gruel                                                                                                                               |
| 3  | Any commercially fortified food (Cerifam, Fafa, Farmixt milk, Favena, Berta, Mother's Choice)                                           |
| 4  | Bread, pasta, rice, noodles, biscuits, cookies, or any other foods made from oats, maize, barley, wheat, sorghum, millet or other grain |
| 5  | Injera or kita                                                                                                                          |
| 6  | Any white potatoes, white yams, Bulla, Kocho, Kasava or any other food made from roots                                                  |
| 7  | Any pumpkin, carrot, squash or sweet potato that are yellow or orange inside                                                            |
| 8  | Dark green leafy vegetables (example: Kale, spinach or Amaranth leaves)                                                                 |
| 9  | Any other vegetables (starchy vegetables: plantain)                                                                                     |
| 10 | Any liver, kidney, heart or organ meats                                                                                                 |
| 11 | Any meat ( which does not include any organ meats, dry meat, any chicken ducks or other birds)                                          |
| 12 | Any dry meat                                                                                                                            |
| 13 | Any chicken ducks or other birds                                                                                                        |
| 14 | Any eggs                                                                                                                                |
| 15 | Any fresh or dried fish or shell fish                                                                                                   |
| 16 | Any food made from beans, peas, lentil or pulses                                                                                        |
| 17 | Any nuts or seeds such as peanuts, sesame, sunflower seeds                                                                              |
| 18 | Any milk product like cheese, yogurt                                                                                                    |
| 19 | Any food made from oil, fat or butter                                                                                                   |
| 20 | Any Ready to use therapeutic foods (like plumpy nut, F100)                                                                              |
| 21 | Candies or chocolates, cakes or donuts                                                                                                  |
| 22 | Any other solid or semi-solid food                                                                                                      |
| 23 | Any iron-containing tablet, syrup or sprinkles                                                                                          |
| 24 | Kolo/Chips/Crisps                                                                                                                       |
| 25 | Biscuits/Cookies                                                                                                                        |
| 26 | Popcorn                                                                                                                                 |
| 27 | Juice/Soda/fizzy drink                                                                                                                  |

**Supplementary Table 3:** Proportion children, mothers and household by dietary diversity scores (DDS), 2014

| Dietary diversity scores | Household DDS | DDS-women    | DDS (6-23 months) | DDS (24-59 months) |
|--------------------------|---------------|--------------|-------------------|--------------------|
|                          | 3788          |              |                   |                    |
| 0                        | 8 (0.2%)      | 32 (0.8%)    | 87 (2.7%)         | 84 (2.6%)          |
| 1                        | 19 (0.5%)     | 253 (6.7%)   | 604 (19.0%)       | 429 (13.5%)        |
| 2                        | 127 (3.4%)    | 792 (20.9%)  | 1200 (37.7%)      | 616 (19.3%)        |
| 3                        | 364 (9.6%)    | 1006 (26.6%) | 774 (24.3%)       | 920 (28.9%)        |
| 4                        | 623 (16.4%)   | 776 (20.5%)  | 327 (10.3%)       | 647 (20.3%)        |
| 5                        | 890 (23.5%)   | 455 (12.0%)  | 142 (4.5%)        | 292 (9.2%)         |
| 6                        | 805 (21.3%)   | 257 (6.8%)   | 45 (1.4%)         | 140 (4.4%)         |
| 7                        | 490 (12.9%)   | 120 (3.2%)   | 8 (0.3%)          | 47 (1.5%)          |
| 8                        | 290 (7.7%)    | 72 (1.9%)    |                   | 8 (0.3%)           |
| 9                        | 128 (3.4%)    | 23 (0.6%)    |                   | 4 (0.1%)           |
| 10                       | 40 (1.1%)     | 2 (0.1%)     |                   |                    |
| 11                       | 4 (0.1%)      |              |                   |                    |
| 12                       | 0 (0.0%)      |              |                   |                    |

**Supplementary Table 4:** Dietary diversity and stunting in Ethiopia, 2014

| <b>HHDDS (household DDS)</b>    |         | <b>&lt;=5</b>           | <b>&gt;5</b>                       | <b>P-value</b>                         |                                      |                |
|---------------------------------|---------|-------------------------|------------------------------------|----------------------------------------|--------------------------------------|----------------|
| N                               |         | 2031                    | 1757                               |                                        |                                      |                |
| stunting                        | Normal  | 1131 (55.7%)            | 1030 (58.6%)                       | 0.045                                  |                                      |                |
|                                 | Stunted | 813 (40.0%)             | 646 (36.8%)                        |                                        |                                      |                |
|                                 | Missing | 87 (4.3%)               | 81 (4.6%)                          |                                        |                                      |                |
| <b>Maternal DDS</b>             |         | <b>&lt;5 dds</b>        | <b>&gt;=5 dds</b>                  | <b>p-value</b>                         |                                      |                |
| N                               |         | 2859                    | 929                                |                                        |                                      |                |
| stunting                        | Normal  | 1595 (55.8%)            | 566 (60.9%)                        | 0.005                                  |                                      |                |
|                                 | Stunted | 1137 (39.8%)            | 322 (34.7%)                        |                                        |                                      |                |
|                                 | Missing | 127 (4.4%)              | 41 (4.4%)                          |                                        |                                      |                |
| <b>Child (6-23 months) DDS</b>  |         | <b>0-3 food groups</b>  | <b>4-7 food groups</b>             | <b>p-value</b>                         |                                      |                |
| N                               |         | 779                     | 117                                |                                        |                                      |                |
| stunting                        | Normal  | 474 (60.8%)             | 65 (55.6%)                         | 0.29                                   |                                      |                |
|                                 | Stunted | 282 (36.2%)             | 48 (41.0%)                         |                                        |                                      |                |
|                                 | Missing | 23 (3.0%)               | 4 (3.4%)                           |                                        |                                      |                |
| <b>Child (24-59 months) DDS</b> |         | <b>0-3 food groups</b>  | <b>4-9 food groups</b>             | <b>p-value</b>                         |                                      |                |
| N                               |         | 1411                    | 876                                |                                        |                                      |                |
| stunting                        | Normal  | 661 (46.8%)             | 448 (51.1%)                        | 0.093                                  |                                      |                |
|                                 | Stunted | 684 (48.5%)             | 400 (45.7%)                        |                                        |                                      |                |
|                                 |         | 66 (4.7%)               | 28 (3.2%)                          |                                        |                                      |                |
| <b>Household food security</b>  |         | <b>Food Secure</b>      | <b>Mildly Food Insecure Access</b> | <b>Moderately Food Insecure Access</b> | <b>Severely Food Insecure Access</b> | <b>p-value</b> |
| N                               |         | 1744                    | 344                                | 1103                                   | 574                                  |                |
| stunting                        | Normal  | 1026 (58.8%)            | 201 (58.4%)                        | 626 (56.8%)                            | 298 (51.9%)                          | 0.005          |
|                                 | Stunted | 621 (35.6%)             | 133 (38.7%)                        | 438 (39.7%)                            | 256 (44.6%)                          |                |
|                                 | Missing | 97 (5.6%)               | 10 (2.9%)                          | 39 (3.5%)                              | 20 (3.5%)                            |                |
| <b>Exclusive Breast feeding</b> |         | <b>Non-exclusive BF</b> | <b>Exclusively BF</b>              | <b>p-value</b>                         |                                      |                |
| N                               |         | 1069                    | 2719                               |                                        |                                      |                |
| stunting                        | Normal  | 569 (53.2%)             | 1592 (58.6%)                       | <0.001                                 |                                      |                |
|                                 | Stunted | 461 (43.1%)             | 998 (36.7%)                        |                                        |                                      |                |
|                                 | Missing | 39 (3.6%)               | 129 (4.7%)                         |                                        |                                      |                |

**Supplementary Table 5:** Prevalence ratios (95% confidence interval) for the associations of household, maternal and child dietary diversity scores and dietary patterns with childhood stunting in Ethiopia, 2014

| Prevalence ratio (95% confidence interval)  |                   |                 |                    |             | Prevalence ratio (95% confidence interval)  |                  |                    |                 |             |             |
|---------------------------------------------|-------------------|-----------------|--------------------|-------------|---------------------------------------------|------------------|--------------------|-----------------|-------------|-------------|
| Household                                   |                   |                 |                    |             | Maternal                                    |                  |                    |                 |             |             |
| Dietary diversity scores                    |                   |                 |                    |             | Dietary diversity scores                    |                  |                    |                 |             |             |
|                                             | <=4               | >=5             | P value/ for trend | AIC (BIC)   | <=4                                         | >=5              | P value/ for trend | AIC (BIC)       |             |             |
| Model 1                                     | 1.00              | 0.97(0.87-1.09) | 0.655              | 4985 (5107) | 1.00                                        | 0.93(0.82-1.07)  | 0.97(0.95-0.99)    | 0.306           | 4984 (5107) |             |
| Model 2                                     | 0.98(0.95-1.01)   | -               | 0.201              | 4983 (5106) | 0.97(0.94-1.01)                             | -                | 0.140              | 4983 (5105)     |             |             |
| Dietary patterns                            |                   |                 |                    |             | Dietary patterns                            |                  |                    |                 |             |             |
|                                             | T1                | T2              | T3                 |             | T1                                          | T2               | T3                 |                 |             |             |
| Pattern 1 ("fish, meat and miscellaneous")  |                   |                 |                    |             | Pattern 1 ("plant-based")                   |                  |                    |                 |             |             |
| Model 1                                     | 1.00              | 0.99(0.86-1.13) | 0.99(0.86-1.13)    | 0.837       | 4897 (5026)                                 | 1.00             | 0.93(0.82-1.06)    | 0.91(0.79-1.05) | 0.184       | 4924 (5052) |
| Model 2                                     | 0.93(0.82-1.06)   | -               | -                  | 0.299       | 4894 (5016)                                 | 0.79(0.64-0.97)* | -                  | 0.025           | 4924 (5046) |             |
| Pattern 2 ("egg, meat, poultry and legume") |                   |                 |                    |             | Pattern 2 ("egg, meat, poultry and legume") |                  |                    |                 |             |             |
| Model 1                                     | 1.00              | 0.97(0.84-1.11) | 1.13(0.97-1.30)    | 0.125       | 4892 (5021)                                 | 1.00             | 1.13(0.99-1.30)    | 1.13(0.98-1.30) | 0.090       | 4926 (5054) |
| Model 2                                     | 1.15(0.92-1.43)   | -               | -                  | 0.217       | 4894 (5016)                                 | 1.16(0.95-1.43)  | -                  | 0.152           | 4921 (5043) |             |
| Pattern 3 ("dairy, vegetable and fruit")    |                   |                 |                    |             | Pattern 3 ("dairy, vegetable and fruit")    |                  |                    |                 |             |             |
| Model 1                                     | 1.00              | 0.96(0.84-1.09) | 0.83(0.72-0.95)**  | 0.009       | 4890 (5018)                                 | 1.00             | 0.94(0.82-1.07)    | 0.87(0.75-1.01) | 0.059       | 4924 (5053) |
| Model 2                                     | 0.76(0.63-0.93)** | -               | -                  | 0.008       | 4888 (5010)                                 | 0.79(0.65-0.95)* | -                  | 0.015           | 4920 (5043) |             |
| Children aged 6-23 months                   |                   |                 |                    |             | Children aged 24-59 months                  |                  |                    |                 |             |             |
| Dietary diversity scores                    |                   |                 |                    |             | Dietary diversity scores                    |                  |                    |                 |             |             |
|                                             | <=3               | >=4             |                    |             | <=3                                         | >=4              |                    |                 |             |             |
| Model 1                                     | 1.00              | 1.22(0.87-1.71) | 0.92(0.87-0.97)    | 0.240       | 1213 (1293)                                 | 1.00             | 0.97(0.85-1.11)    | 0.99(0.96-1.01) | 0.708       | 3485 (3586) |
| Model 2                                     | 1.06(0.96-1.16)   | -               | -                  | 0.234       | 1215 (1295)                                 | 0.98(0.94-1.03)  | -                  | 0.423           | 3487 (3589) |             |
| Dietary patterns                            |                   |                 |                    |             | Dietary patterns                            |                  |                    |                 |             |             |
|                                             | T1                | T2              | T3                 |             | T1                                          | T2               | T3                 |                 |             |             |
| Pattern 1 ("grain-based")                   |                   |                 |                    |             | Pattern 1 ("grain-based")                   |                  |                    |                 |             |             |
| Model 1                                     | 1.00              | 1.11(0.83-1.49) | 1.02(0.79-1.33)    | 0.880       | 1218 (1303)                                 | 1.00             | 0.90(0.77-1.04)    | 0.96(0.81-1.12) | 0.508       | 3488 (3595) |
| Model 2                                     | 1.01(0.95-1.08)   | -               | -                  | 0.690       | 1216 (1297)                                 | 1.00(0.96-1.04)  | -                  | 0.974           | 3488 (3589) |             |
| Pattern 2 ("egg, meat, poultry and legume") |                   |                 |                    |             | Pattern 2 ("egg, meat, poultry and legume") |                  |                    |                 |             |             |
| Model 1                                     | 1.00              | 0.85(0.65-1.11) | 1.03(0.76-1.38)    | 0.918       | 1217 (1301)                                 | 1.00             | 1.02(0.87-1.19)    | 1.07(0.92-1.26) | 0.375       | 3489 (3596) |
| Model 2                                     | 1.05(0.81-1.37)   | -               | -                  | 0.702       | 1216 (1297)                                 | 1.06(0.92-1.23)  | -                  | 0.435           | 3487 (3589) |             |
| Pattern 3 ("dairy, vegetable and fruit ")   |                   |                 |                    |             | Pattern 3 ("dairy, vegetable and fruit ")   |                  |                    |                 |             |             |
| Model 1                                     | 1.00              | 0.97(0.75-1.25) | 1.03(0.77-1.39)    | 0.891       | 1218 (1303)                                 | 1.00             | 1.10(0.94-1.28)    | 0.86(0.74-1.01) | 0.072       | 3481 (3588) |
| Model 2                                     | 1.02(0.82-1.28)   | -               | -                  | 0.858       | 1217 (1297)                                 | 0.90(0.80-1.01)  | -                  | 0.062           | 3484 (3586) |             |
| Children aged 6-59 months                   |                   |                 |                    |             | Children aged 6-59 months                   |                  |                    |                 |             |             |
| Dietary patterns                            |                   |                 |                    |             | Dietary patterns                            |                  |                    |                 |             |             |
|                                             | T1                | T2              | T3                 |             | T1                                          | T2               | T3                 |                 |             |             |
| Pattern 1 ("grain-based")                   |                   |                 |                    |             | Pattern 1 ("grain-based")                   |                  |                    |                 |             |             |
| Model 1                                     | 1.00              | 0.94(0.82-1.07) | 0.97(0.85-1.11)    | 0.612       | 4685 (4804)                                 | 1.00             | 0.94(0.82-1.07)    | 0.97(0.85-1.11) | 0.612       | 4685 (4804) |
| Model 2                                     | 1.00(0.97-1.04)   | -               | -                  | 0.783       | 4683 (4797)                                 | 1.00(0.97-1.04)  | -                  | 0.783           | 4683 (4797) |             |
| Pattern 2 ("egg, meat, poultry and legume") |                   |                 |                    |             | Pattern 2 ("egg, meat, poultry and legume") |                  |                    |                 |             |             |
| Model 1                                     | 1.00              | 0.97(0.84-1.11) | 1.06(0.92-1.22)    | 0.457       | 4683 (4803)                                 | 1.00             | 0.97(0.84-1.11)    | 1.06(0.92-1.22) | 0.457       | 4683 (4803) |
| Model 2                                     | 1.06(0.93-1.20)   | -               | -                  | 0.410       | 4683 (4796)                                 | 1.06(0.93-1.20)  | -                  | 0.410           | 4683 (4796) |             |
| Pattern 3 ("dairy, vegetable and fruit ")   |                   |                 |                    |             | Pattern 3 ("dairy, vegetable and fruit ")   |                  |                    |                 |             |             |
| Model 1                                     | 1.00              | 1.07(0.93-1.22) | 0.89(0.78-1.03)    | 0.138       | 4679 (4799)                                 | 1.00             | 1.07(0.93-1.22)    | 0.89(0.78-1.03) | 0.138       | 4679 (4799) |
| Model 2                                     | 0.92(0.83-1.02)   | -               | -                  | 0.116       | 4681 (4794)                                 | 0.92(0.83-1.02)  | -                  | 0.116           | 4681 (4794) |             |

\*p<0.05; \*\*p<0.01; AIC – Akaike's information criterion; BIC – Bayesian information criterion

**Model 1** was adjusted for both individual (maternal body mass index, age (if applied), household food security, number of under-five children in a household, maternal education, maternal height, exclusive breast feeding) and community-level patterns (water source)

**Model 2** was adjusted for all the above covariates but dietary diversity or dietary pattern scores were included as continuous variables without categorization.

*P for trend was determined by including the tertiles of dietary patterns as continuous variables (model 1)*
